# Supplementary material
Source: PubMed Central journal article supplement (PMC1458799)

# Growth curve

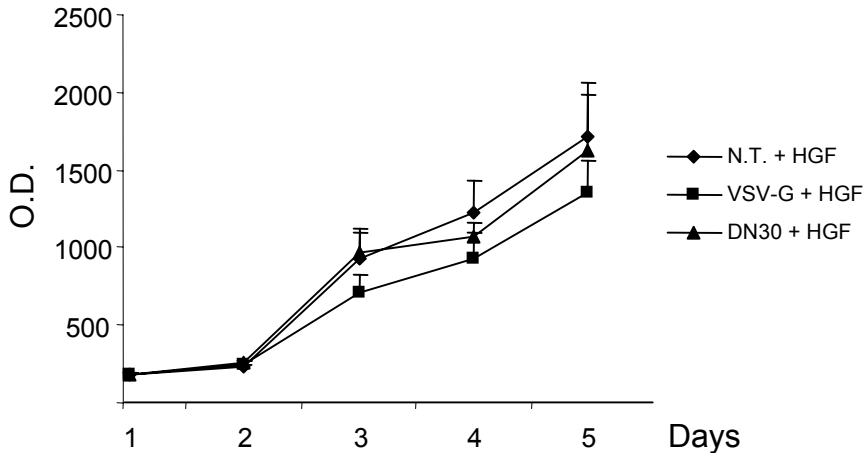

Supplement: pnas_0508156103_1.pdf [file pnas_0508156103_1.pdf]

**A**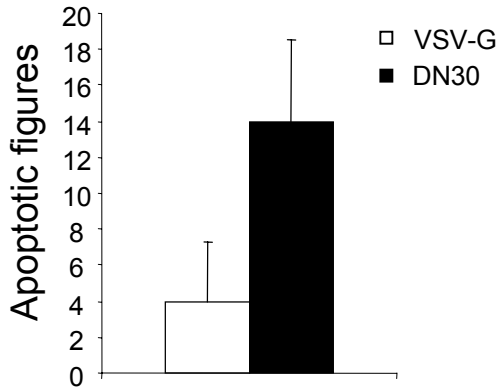**B**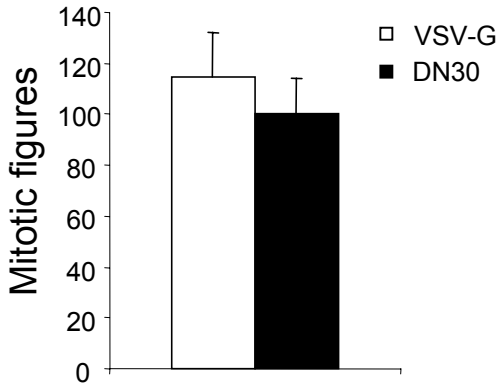

Supplement: pnas_0508156103_2.pdf [file pnas_0508156103_2.pdf]

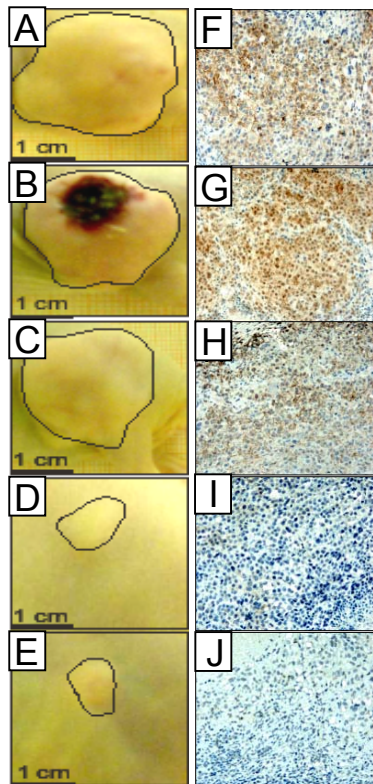

### K DN30 binding to HGFR

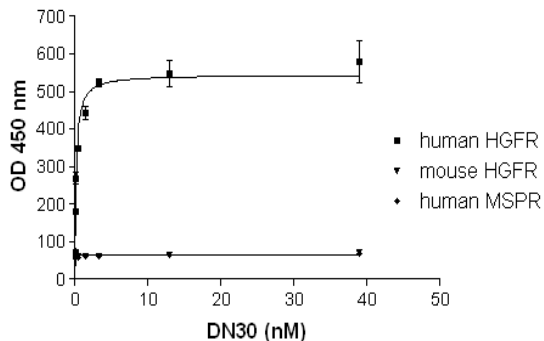

### L HGF binding to HGFR

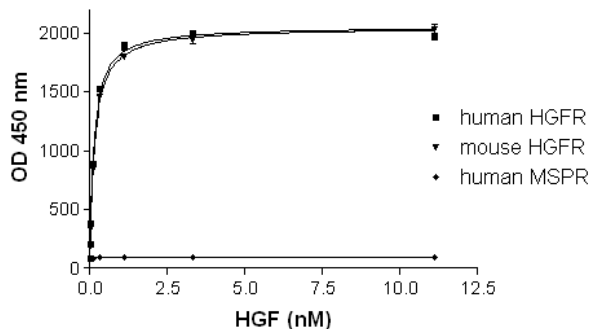

Supplement: pnas_0508156103_3.pdf [file pnas_0508156103_3.pdf]

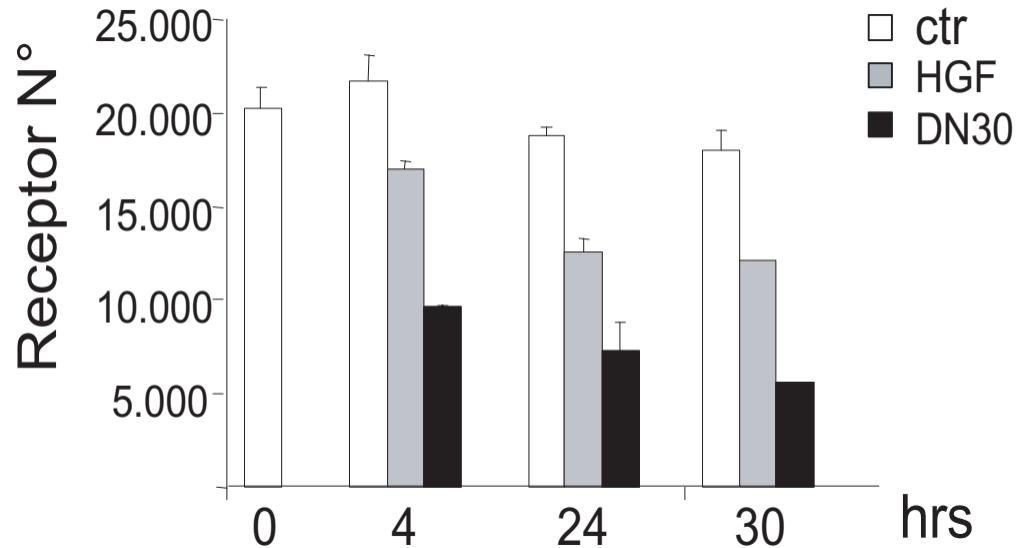

Supplement: pnas_0508156103_4.pdf [file pnas_0508156103_4.pdf]

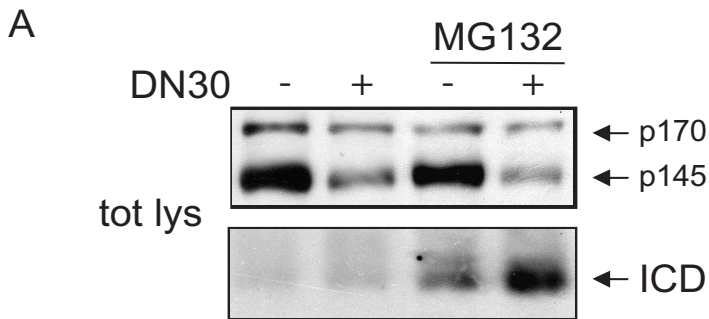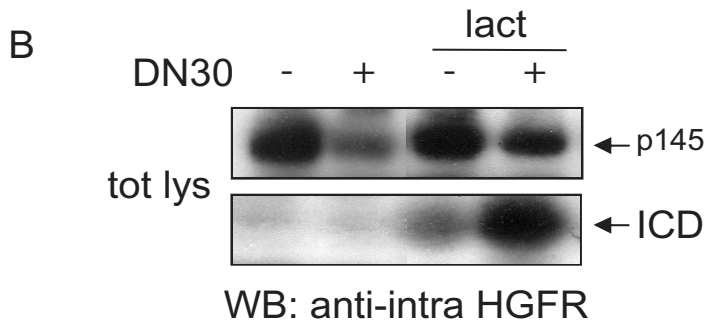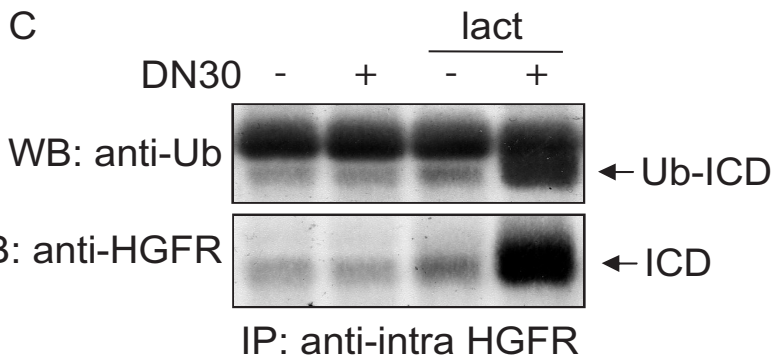

Supplement: pnas_0508156103_5.pdf [file pnas_0508156103_5.pdf]

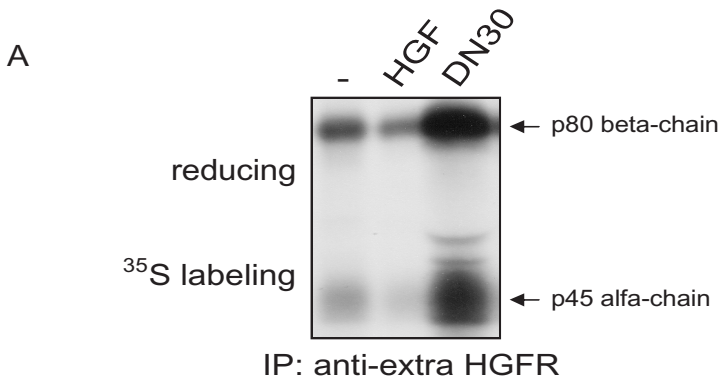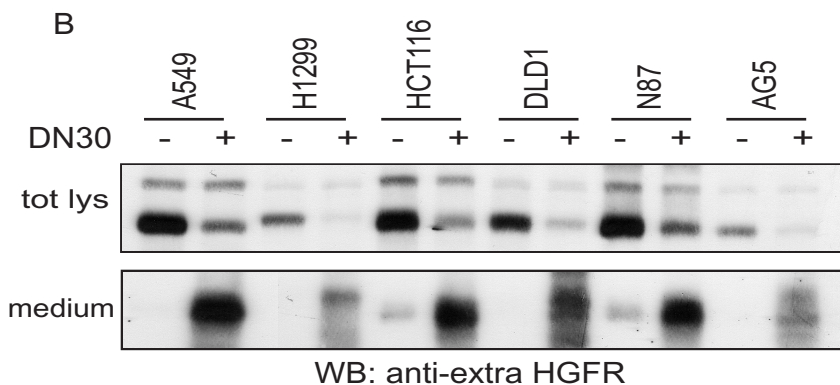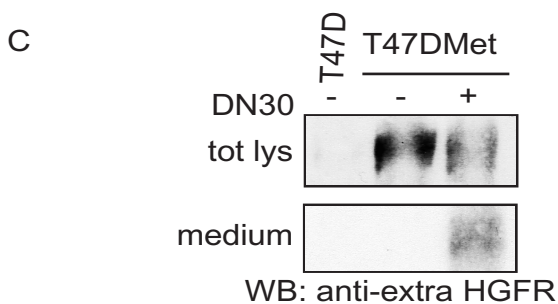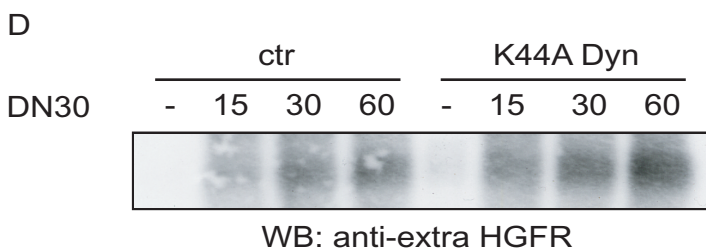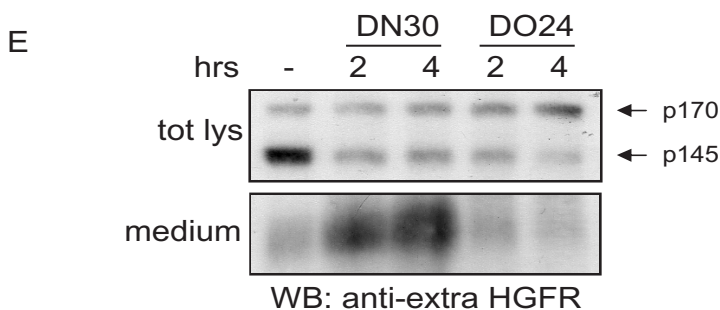

Supplement: pnas_0508156103_6.pdf [file pnas_0508156103_6.pdf]
